# Supplementary material
Source: PubMed Central journal article supplement (PMC6764757)
Supplement: NIHMS1518017-supplement-1.pdf [file NIHMS1518017-supplement-1.pdf]

## Supplemental Material

## Relationship Formation Task Question Sets

## Form A

1. Tell your partner a bit about yourself.
2. What would constitute a perfect day for you?
3. For what in your life do you feel most grateful?
4. Is there something that you've dreamed of doing for a long time? Why haven't you done it?
5. What is your most treasured memory?
6. If you were going to become a close friend with your partner, please share what would be important for him or her to know.

## Form B

1. Tell your partner a bit about yourself.
2. What would your ideal or perfect life be?
3. What is the greatest accomplishment of your life?
4. If a crystal ball could tell you the truth about yourself, your life, the future, or anything else, what would you want to know?
5. Can you envision how you are likely to look back upon the things you are doing today? If so, how much do you try to live now as you think you will one day wish you had lived?
6. Do you believe our life is predetermined by fate or is solely a consequence of the choices we make (or both)? Explain why.
